# Supplementary material for: Evaluating the risk of hypertension in residents in primary care in Shanghai, China with machine learning algorithms
Source: Front Public Health. 2022 Oct 4;10:984621. doi: 10.3389/fpubh.2022.984621 (PMC9577109; doi:10.3389/fpubh.2022.984621)
Supplement: Supplementary file 1 [file Table_1.XLSX]

## Sheet: Sheet1
No.	variables
1	data code
2	community
3	identification card
4	date of health examination
5	gender
6	age when qiut drinking
7	urine specific gravity
8	elderly health self-assessment
9	exercise frequency
10	smoking status
11	frequency of drinking
12	quit drinking or not
13	drunk in the past year
14	eyesight-left eye
15	eyesight-right eye
16	oral cavity-mouth and lips
17	barrel chest
18	lung-Breath sounds
19	lung-pulmonary rales
20	heart-rhythm
21	heart-murmur
22	abdominal tenderness
23	abdominal mass
24	abdomen-hepatomegaly
25	abdomen-splenomegaly
26	abdomen-shifting dullness
27	lower limb edema
28	pulsatile dorsalis pedis artery
29	Urine-pH
30	urinary protein level
31	urinary glucose level
32	urine acetone bodies
33	urobilinogen
34	bilirubin
35	urinary occult blood
36	vitamin
37	urine color
38	transparency of the urine
39	urine erythrocyte
40	eating habits-vegetarian diet
41	eating habits-balance portion of vegetables and meat
42	eating habits-meat as the main food
43	eating habits-addicted to oil
44	high salt consumption
45	eating habits-addicted to sugar
46	types of drinking-yellow rice wine
47	types of drinking-beer
48	types of drinking-others
49	types of drinking-liqueur
50	types of drinking-wine
51	types of drinking-medicinal liquor
52	age
53	body temperature
54	pulse rate
55	respiratory rate
56	waist circumference
57	hip circumference
58	waist-hip ratio
59	diastolic blood pressure measured on the upper left arm
60	systolic blood pressure measured on the upper left arm
61	diastolic blood pressure measured on the upper right arm
62	systolic blood pressure measured on the upper right arm
63	height
64	weight
65	BMI
66	time spent engaged in exercise
67	time insisted on tempering (years)
68	number of cigarettes smoked daily
69	age when starting to smoke
70	age when starting to drink
71	heart-heart rate
72	glucose level
73	total cholesterol level
74	triglyceride level
75	high-density lipoprotein cholesterol level
76	low-density lipoprotein cholesterol level
77	urea nitrogen level
78	creatinine level
79	uric acid level
80	total bilirubin
81	glutamic-pyruvic transaminase
82	glutamic oxalacetic transaminase
83	total protein
84	albumin
85	globulin
86	ratio of albumin to globulin
87	urine creatinine
88	urinary microalbumin
89	red blood cell count
90	hemoglobin
91	hematokrit
92	blood platelet count
93	platelet hematocrit
94	number of eosinophils
95	number of basophils
96	number of lymphocytes
97	number of neutrophils
98	number of monocytes
99	urine leukocyte
100	white blood cell count
101	hepatic and gall diseases or not
102	hypertension or not
103	hyperlipidemia or not
104	osteoarthropathy or not
105	coronary heart disease or not
106	respiratory infection or not
107	chronic nephrosis or not
108	chronic obstructive pulmonary disease or not
109	other urinary diseases or not
110	cerebrovascular disease or not
111	diabetes status
112	gastroduodenal diseases or not
113	heart failure or not
114	arhythmia or not
115	symptom-systemic symptoms
116	symptom-neural symptoms
117	symptom-edema
118	symptom-dizziness and headache
119	symptom-abnormity of urine
120	symptom-chest and back discomfort
121	symptom-abnormal limb function
122	symptom-limb pain
123	motor function
124	results of electrocardiogram-STT wave changes
125	results of electrocardiogram-Q wave changes
126	results of electrocardiogram-arrhythmia
127	results of ultrasound
